1 **Surveillance of COVID-19 vaccination in US nursing homes, December 2020-April 2021**

2

3 Keywords: COVID-19; Vaccination; Nursing Home; Surveillance

4

5 Authors: Andrew Isaac Geller, MD; Daniel S. Budnitz, MD, MPH; Heather Dubendris, MSPH;  
6 Radhika Gharpure, DVM, MPH; Minn Minn Soe, MBBS, MPH; Hsiu Wu, MD; Elizabeth J.  
7 Kalayil, MPH; Andrea L. Benin, MD; Suchita A. Patel, DO, MPH; Megan C. Lindley,  
8 MPH; Ruth Link-Gelles, PhD, MPH

9

10 Affiliation: CDC COVID-19 Response Team

11

12 Corresponding author: Andrew Geller, MD, CDC COVID-19 Response Team, National Center for  
13 Emerging and Zoonotic Infectious Diseases, Division of Healthcare Quality  
14 Promotion, CDC, 1600 Clifton Rd NE, Mailstop V18-4, Atlanta, GA 30329;  
15 [ageller@cdc.gov](mailto:ageller@cdc.gov)

16

17 Word count (Limit 1,500): 1,493

18

19 Charts, Tables, and Figures (Limit 2): 2 Figures

20 Unstructured Abstract: *Word count = 150; Limit 150*

21 Monitoring COVID-19 vaccination coverage among nursing home (NH) residents and staff is  
22 important to ensure high coverage and guide patient-safety policies. With the termination of the  
23 federal Pharmacy Partnership for Long-Term Care Program, another source of facility-based  
24 vaccination data is needed. We compared numbers of COVID-19 vaccinations administered to NH  
25 residents and staff reported by pharmacies participating in the temporary federal Pharmacy  
26 Partnership for Long-Term Care Program with those reported by NHs participating in new  
27 COVID-19 vaccination modules of CDC's National Healthcare Safety Network (NHSN). Pearson  
28 correlation coefficients comparing the number vaccinated between the two approaches were 0.89,  
29 0.96, and 0.97 for residents and 0.74, 0.90, and 0.90 for staff, in the weeks ending January 3, 10,  
30 and 17, respectively. Based on subsequent NHSN reporting, vaccination coverage with  $\geq 1$  vaccine  
31 dose reached 77% for residents and 50% for staff the week ending January 31 and plateaued  
32 through April 2021.

33  
34 Keywords: COVID-19; Vaccination; Nursing Home; Surveillance

35  
36 Three-question summary box: *(85 words; limit 85)*

37 1) *What is the current understanding of the subject?*

38 Because of high risk of disease, nursing home residents and staff were prioritized for COVID-19  
39 vaccination when doses were limited.

40  
41 2) *What does this report add to the literature?*

42 National monitoring of nursing home residents and staff vaccination coverage through the CDC  
43 National Healthcare Safety Network (NHSN) correlated with vaccination administration reports  
44 from the federal Pharmacy Partnership for Long-Term Care Program in January 2021. NHSN-  
45 reported vaccination coverage rates plateaued from February through April 2021.

46  
47 3) *What are the implications for public health practice?*

48 NHSN can track COVID-19 vaccination in nursing homes and help guide efforts to increase  
49 vaccine uptake in residents and staff.

## 50 **Introduction**

51 Residents and staff of nursing homes (NHs) are at increased risk for SARS-CoV-2 infection,<sup>1-3</sup> and NH  
52 residents are at risk for severe complications of COVID-19.<sup>1,4-7</sup> To help protect this disproportionately  
53 affected population, in December 2020, the Centers for Disease Control and Prevention (CDC) launched  
54 the Pharmacy Partnership for Long-Term Care Program, facilitating on-site COVID-19 vaccination of  
55 NH residents as well as NH staff.<sup>8</sup> Among the approximately 11,000 NHs that had at least one on-site  
56 vaccination clinic in the first month of the program, an estimated three-quarters of residents (77.8%) and  
57 one-third of staff (37.5%) were vaccinated with  $\geq 1$  dose of a COVID-19 vaccine.<sup>9</sup>

58 CDC's National Healthcare Safety Network (NHSN) is the nation's web-based surveillance program for  
59 monitoring healthcare-associated adverse events, annual healthcare staff influenza vaccinations, and  
60 other patient-safety practices. In December 2020, NHSN released COVID-19 reporting modules for  
61 tracking vaccination coverage among residents and staff of long-term care facilities.<sup>10</sup> These modules  
62 allow for voluntary weekly reporting by facilities and are designed to collect data on the number of  
63 current residents and staff eligible for vaccination and who have been vaccinated.<sup>10</sup>

64 The Pharmacy Partnership for Long-Term Care Program was designed as a time-limited initiative to  
65 facilitate a limited number of vaccination clinics at each participating facility. With the conclusion of the  
66 program, reporting of facility-level resident and staff COVID-19 vaccine administration data to CDC  
67 has ceased, but the need for a national data source for ongoing monitoring of COVID-19 vaccination in  
68 NHs remains, so the Centers for Medicare and Medicaid Services has begun to require NH reporting  
69 through NHSN as of June 2021.<sup>11</sup>

70 The objectives of this analysis were to: 1) compare numbers of COVID-19 vaccinations administered to  
71 NH residents and staff in January 2021 as reported by pharmacies participating in the Pharmacy  
72 Partnership for Long-Term Care Program, and the NHSN COVID-19 vaccination reporting modules,  
73 among CMS-certified NHs that participated in both; and 2) report weekly COVID-19 vaccination  
74 coverage for residents and staff among CMS-certified NHs voluntarily reporting through NHSN from  
75 December 2020 through April 2021.

## 76 **Methods**

### 77 Correlation of COVID-19 Vaccination Administration Reporting

78 We used facility NHSN Organization ID and CMS Certification Numbers to identify NHs that had their  
79 first Pharmacy Partnership for Long-Term Care Program vaccination clinic in the weeks ending January

80 3, 10, and 17, and also reported vaccination coverage data through NHSN. Data were accessed on  
81 February 22, 2021. We identified a minority number of facilities in which the total number of doses  
82 administered to residents or staff according to Pharmacy Partnership for Long-Term Care Program  
83 reporting exceeded the total number of current residents or staff eligible to be vaccinated as reported to  
84 NHSN, and set the total vaccinated to the total number of residents or staff reported to NHSN. We  
85 calculated Pearson correlation coefficients to compare vaccine administration data reported by the  
86 Pharmacy Partnership for Long-Term Care Program and NHSN.

### 87 COVID-19 Vaccination Coverage in Facilities Reporting to NHSN

88 Among all CMS-certified NHs reporting vaccination data through NHSN, we calculated the numbers  
89 and proportions of residents and staff who received doses of COVID-19 vaccine among facilities  
90 reporting each week from the week ending December 20, 2020 through the week ending May 9, 2021.

91 This activity was reviewed by CDC and was conducted consistent with applicable federal law and CDC  
92 policy.<sup>§</sup>

## 93 **Results**

### 94 Correlation of COVID-19 Vaccination Administration Reporting

95 During the three consecutive one-week periods, 1028 CMS-certified NHs reported vaccination data on  
96 residents to both the Pharmacy Partnership for Long-Term Care Program as well as to NHSN; 818  
97 CMS-certified NHs participated in the Pharmacy Partnership for Long-Term Care Program and reported  
98 COVID-19 vaccination coverage to NHSN for staff. Among these NHs, the number of vaccine doses  
99 administered in the weeks ending January 3, 10, and 17, 2021 exceeded the total number of current  
100 residents eligible to receive COVID-19 vaccination as reported to NHSN for 62 (17.7%), 53 (12.5%),  
101 and 33 (12.9%) facilities, respectively, and the number of vaccine doses administered exceeded the total  
102 number of eligible staff reported to NHSN for 13 (4.5%), 9 (2.7%), and 5 (2.6%) facilities, respectively.

103 Pearson correlation coefficients for numbers of COVID-19 vaccinations administered to NH residents  
104 and staff as reported by the Pharmacy Partnership for Long-Term Care Program and the NHSN COVID-  
105 19 vaccination coverage modules were 0.89, 0.96, and 0.97 for NH residents and 0.74, 0.90, and 0.90 for  
106 NH staff, in the weeks ending January 3, 10, and 17, 2021.

### 107 COVID-19 Vaccination Coverage in Facilities Reporting to NHSN

---

<sup>§</sup> See e.g., 45 C.F.R. part 46, 21 C.F.R. part 56; 42 U.S.C. §241(d); 5 U.S.C. §552a; 44 U.S.C. §3501 et seq.

108 A total of 5065 NHs reported resident COVID-19 vaccination coverage for at least 1 week from the  
109 week ending December 20, 2020 through the week ending May 9, 2021; a total of 3554 NHs reported  
110 staff COVID-19 vaccination coverage for at least 1 week during the same period. Among NHs reporting  
111 to NHSN, coverage with at least one dose of COVID-19 vaccine rose rapidly and reached 77.0% for  
112 residents (**Figure 1**) and 49.6% for staff (**Figure 2**) during the week ending January 31, 2021. Coverage  
113 with at least one dose of COVID-19 vaccine then plateaued for both NH residents and NH staff through  
114 April 2021. By the week ending January 31, 2021, 50.5% of residents and 30.5% of staff had received a  
115 complete series of COVID-19 vaccine, and the proportion of residents and staff who had received a  
116 complete series continued to increase through April 2021.

117 In the most recent 4-week period analyzed, from April 12, 2021–May 9, 2021, 2,276 NHs reported  
118 resident vaccination data, representing 13.8% of all CMS-certified NHs enrolled in NHSN, and 1,997  
119 NHs reported staff vaccination data, representing 12.1% of NHs. These NHs reported 77.1% of residents  
120 (n=130,427) and 55.5% of staff (n=131,317) received at least partial vaccination; 72.8% (n=123,131)  
121 and 51.8% (n=122,545) received a completed vaccination series.

## 122 **Discussion**

123 High correlation between vaccine administration reported by the Pharmacy Partnership for Long-Term  
124 Care Program and NHSN COVID-19 vaccination reporting modules suggests NHSN can be used to  
125 track COVID-19 vaccination in NHs. With the completion of the Pharmacy Partnership for Long-Term  
126 Care Program, there remains a public health need to track COVID-19 vaccination coverage in NHs,  
127 where residents remain at elevated risk for morbidity and mortality and both residents as well as staff are  
128 at high risk for SARS-CoV-2 acquisition and transmission.

129 Continued tracking of COVID-19 vaccination coverage in NHs is important for several reasons. First,  
130 vaccination coverage of staff members has plateaued, suggesting further efforts are needed to increase  
131 coverage in these important healthcare personnel. Historically, high staff turnover rates at NHs—  
132 approximating 100 percent annually<sup>12</sup>—warrant ongoing COVID-19 vaccination efforts. Additionally,  
133 addressing vaccine hesitancy of NH staff<sup>13-15</sup> and improving vaccine acceptance is needed. Ongoing  
134 weekly surveillance from NHSN can track the impact of such efforts. Second, although currently  
135 plateaued at a rate higher than in staff members, NH resident vaccination coverage should continue to be  
136 monitored to track national vaccination efforts, as new residents are admitted to facilities on a daily  
137 basis. Third, jurisdictions can use weekly coverage rates to target intervention resources to facilities with

138 greatest need of vaccination uptake.<sup>16</sup> Fourth, NHs may use facility vaccination rates to guide infection  
139 control policies, such as those pertaining to indoor visitation with NH residents.<sup>17</sup>

140 This report is subject to a few limitations. First, correlation between Pharmacy Partnership for Long-  
141 Term Care Program and NHSN data is not expected to be exact. Pharmacy Partnership for Long-Term  
142 Care Program data include only individuals vaccinated on-site, whereas NHSN counts persons  
143 vaccinated at the facility or elsewhere. Second, there were instances in which the total number of doses  
144 administered to residents or staff according to Pharmacy Partnership for Long-Term Care Program  
145 reporting exceeded the total number of current residents or staff reported to NHSN. One explanation is  
146 that the number of vaccine doses brought to a facility exceeded the number of residents and staff who  
147 decided to be vaccinated, and to avoid wastage other persons (e.g., healthcare workers from other  
148 facilities) were vaccinated and recorded as facility residents or staff. Another possible explanation is that  
149 the number of residents or staff were underreported to NHSN. Nonetheless, the number of facilities  
150 reporting excess doses administered was small and declined each week. Third, facilities reporting NHSN  
151 COVID-19 vaccination coverage may not be representative of all nursing homes. Reporting to NHSN  
152 was voluntary, and approximately one-tenth of eligible facilities reported vaccination coverage data in  
153 the last 4 weeks of the study period. Nonetheless, the January vaccination coverage rates reported by  
154 NHSN the Pharmacy Partnership for Long-Term Care Program were similar for residents (77.3% versus  
155 77.8%) and staff (50.0% vs. 37.5%)<sup>9</sup>.

156 As the Pharmacy Partnership for Long-Term Care Program has been replaced with direct federal  
157 allocations of COVID-19 vaccine to the long-term care pharmacies, which have traditionally provided  
158 vaccines to nursing homes,<sup>8</sup> NHSN is now the single national source of facility-level resident and staff  
159 COVID-19 vaccination data to monitor vaccination progress, target vaccination support programs, and  
160 help inform infection control policies.

161

## 162 **Acknowledgments**

163 The authors would like to thank the following people for assistance with data analysis and data quality  
164 assurance: Karen Jones and Audrey Robnett-Brown of the Centers for Disease Control and Prevention  
165 (CDC); Dorothy Dennard, Shiyi Wang, Tianyi Zhou, and Adewole Adetokun (of Goldbelt C6, LLC,  
166 contractor to CDC); and Emily Witt (of CACI, Inc, contractor to CDC).

## 167 **Disclaimer**

168 The findings and conclusions in this report are those of the authors and do not necessarily represent the  
169 official position of the Centers for Disease Control and Prevention.

## 170 **Declaration of Conflicting Interests**

171 The authors declared no potential conflicts of interest with respect to the research, authorship, and/or  
172 publication of this article.

## 173 **Funding**

174 The authors received no financial support for the research, authorship, and/or publication of this article.

175

## 176 **References**

- 177 1. US Department of Health and Human Services, Centers for Medicare and Medicaid Services.  
178 COVID-19 nursing home data. 2021; Accessed April 13, 2021.  
179 <https://data.cms.gov/stories/s/COVID-19-Nursing-Home-Data/bkwz-xpvg/>
- 180 2. Ryskina KL, Yun H, Wang H, Chen AT, Jung HY. Characteristics of Nursing Homes by  
181 COVID-19 Cases among Staff: March to August 2020. *J Am Med Dir Assoc*. 2021.  
182 doi:10.1016/j.jamda.2021.02.004
- 183 3. Hughes MM, Groenewold MR, Lessem SE, et al. Update: Characteristics of Health Care  
184 Personnel with COVID-19 - United States, February 12-July 16, 2020. *MMWR Morb Mortal*  
185 *Wkly Rep*. 2020;69(38):1364-1368. doi:10.15585/mmwr.mm6938a3
- 186 4. Bagchi S, Mak J, Li Q, et al. Rates of COVID-19 Among Residents and Staff Members in  
187 Nursing Homes - United States, May 25-November 22, 2020. *MMWR Morb Mortal Wkly Rep*.  
188 2021;70(2):52-55. doi:10.15585/mmwr.mm7002e2



- 189 5. McMichael TM, Clark S, Pogojans S, et al. COVID-19 in a Long-Term Care Facility - King  
190 County, Washington, February 27-March 9, 2020. *MMWR Morb Mortal Wkly Rep.*  
191 2020;69(12):339-342. doi:10.15585/mmwr.mm6912e1
- 192 6. Bialek S, Boundy E, Bowen V, et al. Severe Outcomes Among Patients with Coronavirus  
193 Disease 2019 (COVID-19) - United States, February 12-March 16, 2020. *MMWR Morb Mortal*  
194 *Wkly Rep.* 2020;69(12):343-346. doi:10.15585/mmwr.mm6912e2
- 195 7. Wortham JM, Lee JT, Althomsons S, et al. Characteristics of Persons Who Died with COVID-19  
196 - United States, February 12-May 18, 2020. *MMWR Morb Mortal Wkly Rep.* 2020;69(28):923-  
197 929. doi:10.15585/mmwr.mm6928e1
- 198 8. US Department of Health and Human Services, Centers for Disease Control and Prevention.  
199 Understanding the Pharmacy Partnership for Long-Term Care Program. 2021; Accessed March  
200 22, 2021. <https://www.cdc.gov/vaccines/covid-19/long-term-care/pharmacy-partnerships.html>
- 201 9. Gharpure R, Guo A, Bishnoi CK, et al. Early COVID-19 First-Dose Vaccination Coverage  
202 Among Residents and Staff Members of Skilled Nursing Facilities Participating in the Pharmacy  
203 Partnership for Long-Term Care Program - United States, December 2020-January 2021.  
204 *MMWR Morb Mortal Wkly Rep.* 2021;70(5):178-182. doi:10.15585/mmwr.mm7005e2
- 205 10. US Department of Health and Human Services, Centers for Disease Control and Prevention.  
206 National Healthcare Safety Network (NHSN) Long-term Care Facility Component - HCP &  
207 Resident COVID-19 Vaccination. 2021; Accessed March 27, 2021.  
208 <https://www.cdc.gov/nhsn/ltc/weekly-covid-vac/index.html>
- 209 11. US Department of Health and Human Services, Centers for Medicare and Medicaid Services.  
210 CMS Expanding Efforts to Grow COVID-19 Vaccine Confidence and Uptake Amongst Nation's  
211 Most Vulnerable. 2021; Accessed May 11, 2021. [https://www.cms.gov/newsroom/press-  
212 releases/cms-expanding-efforts-grow-covid-19-vaccine-confidence-and-uptake-amongst-nations-  
213 most-vulnerable](https://www.cms.gov/newsroom/press-releases/cms-expanding-efforts-grow-covid-19-vaccine-confidence-and-uptake-amongst-nations-most-vulnerable)
- 214 12. Gandhi A, Yu H, Grabowski DC. High Nursing Staff Turnover In Nursing Homes Offers  
215 Important Quality Information. *Health Aff (Millwood)*. 2021;40(3):384-391.  
216 doi:10.1377/hlthaff.2020.00957
- 217 13. Berry SD, Johnson KS, Myles L, et al. Lessons learned from frontline skilled nursing facility  
218 staff regarding COVID-19 vaccine hesitancy. *J Am Geriatr Soc.* 2021. doi:10.1111/jgs.17136
- 219 14. Unroe KT, Evans R, Weaver L, Rusyniak D, Blackburn J. Willingness of Long-Term Care Staff  
220 to Receive a COVID-19 Vaccine: A Single State Survey. *J Am Geriatr Soc.* 2021;69(3):593-599.  
221 doi:10.1111/jgs.17022



- 222 15. Harrison J, Berry S, Mor V, Gifford D. "Somebody Like Me": Understanding COVID-19  
223 Vaccine Hesitancy Among Staff in Skilled Nursing Facilities. *J Am Med Dir Assoc*. 2021.  
224 doi:10.1016/j.jamda.2021.03.012
- 225 16. US Department of Health and Human Services, Centers for Disease Control and Prevention.  
226 NHSN Group Users - NHSN User Resources. 2021; Accessed April 16, 2021.  
227 <https://www.cdc.gov/nhsn/group-users/index.html>
- 228 17. US Department of Health and Human Services, Centers for Medicare and Medicaid Services.  
229 CMS Updates Nursing Home Guidance with Revised Visitation Recommendations. 2021;  
230 Accessed March 11, 2021. [https://www.cms.gov/newsroom/press-releases/cms-updates-nursing-](https://www.cms.gov/newsroom/press-releases/cms-updates-nursing-home-guidance-revised-visitation-recommendations)  
231 [home-guidance-revised-visitation-recommendations](https://www.cms.gov/newsroom/press-releases/cms-updates-nursing-home-guidance-revised-visitation-recommendations)
- 232

233 **Figure 1**

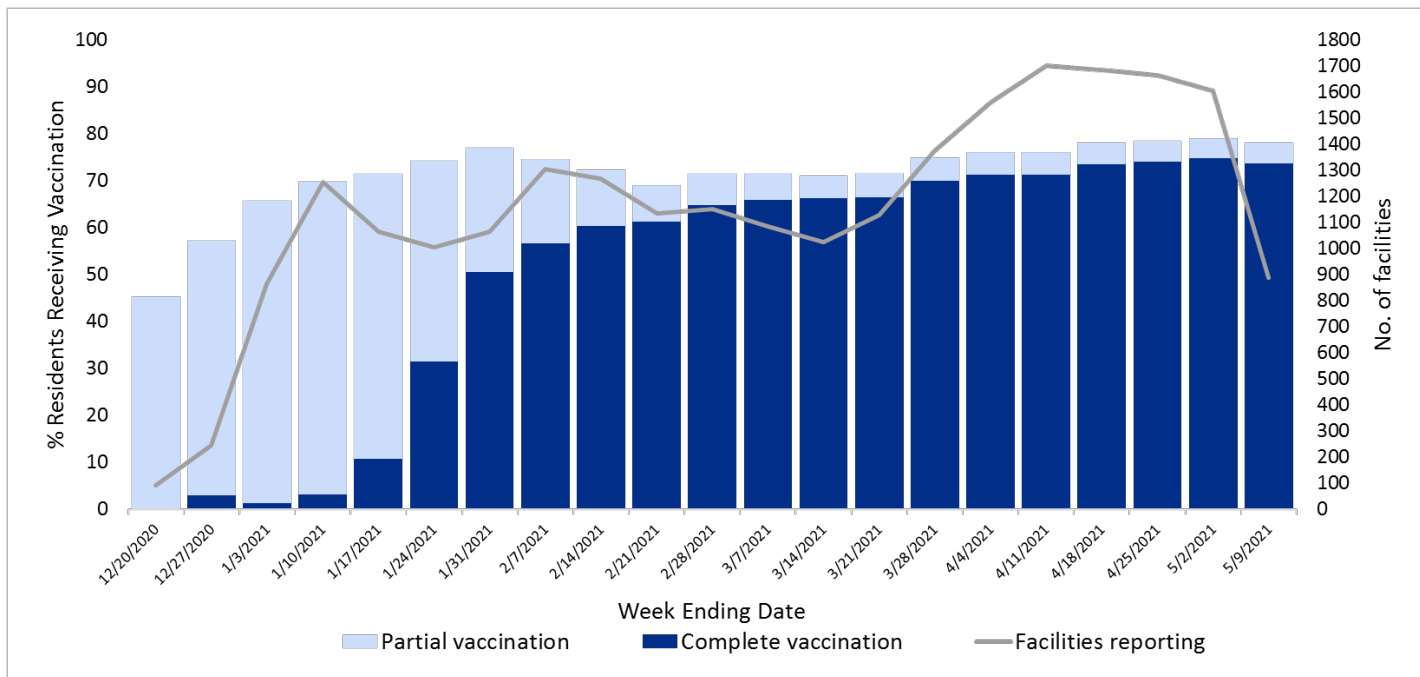

234

235 **COVID-19 vaccination coverage of nursing home residents among facilities reporting to the**  
 236 **National Healthcare Safety Network each week.** Shaded bars indicate the proportion of residents  
 237 receiving partial and complete vaccination, and line plot indicates the number of facilities reporting  
 238 resident vaccination coverage. Data are current as of May 11, 2021. Abbreviation: COVID-19,  
 239 coronavirus disease 2019.

240

241 **Figure 2**

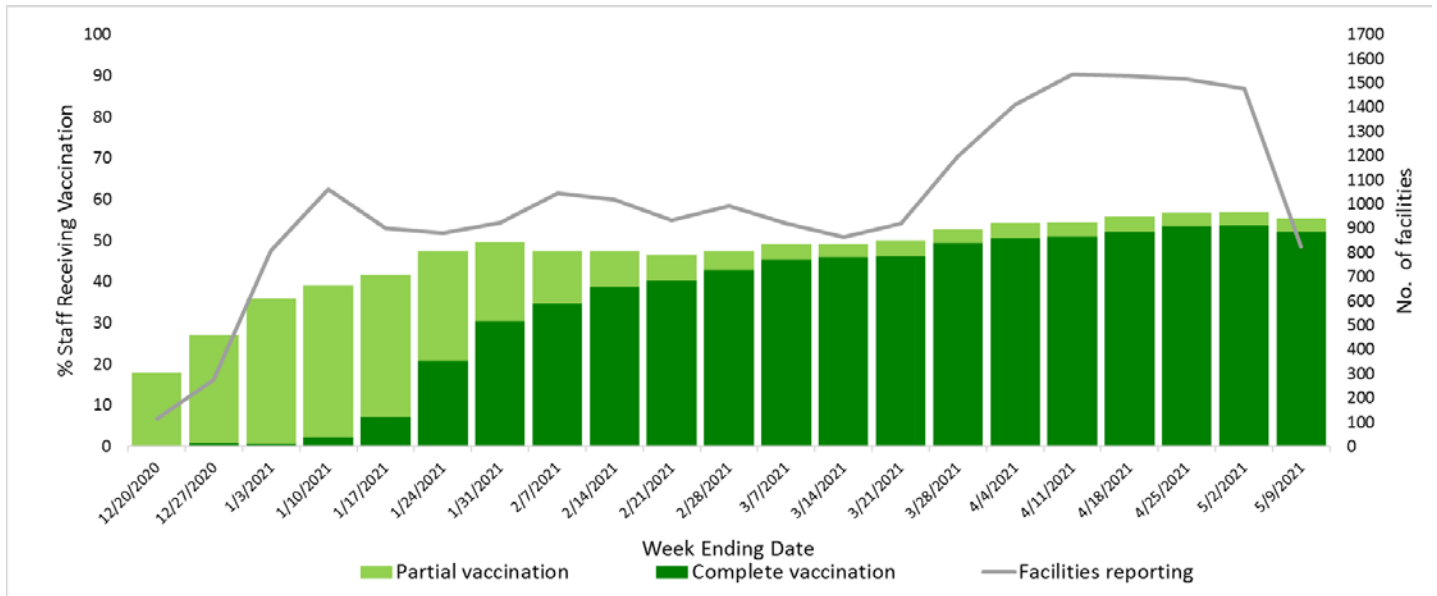

242

243 **COVID-19 vaccination coverage of nursing home staff among facilities reporting to the National**

244 **Healthcare Safety Network each week.** Shaded bars indicate the proportion of staff receiving partial

245 and complete vaccination, and line plot indicates the number of facilities reporting staff vaccination

246 coverage. Data are current as of May 11, 2021. Abbreviation: COVID-19, coronavirus disease 2019.

247
